# Supplementary material for: Telehealth Perceptions Among US Immigrant Patients at an Academic Internal Medicine Practice: Cross-sectional Study
Source: PubMed Central journal article supplement (PMC9403821; doi:10.2196/36069), 2022-08-10
Supplement: humanfactors_v9i3e36069_app1.pdf [file humanfactors_v9i3e36069_app1.pdf]

Background: (staff to complete)

patient number: -----

|                                            |                       |           |          |  |
|--------------------------------------------|-----------------------|-----------|----------|--|
| Seen by PCP today                          | Yes                   | No        |          |  |
| How long have you lived in the US (years)? |                       |           |          |  |
| Country of origin                          |                       |           |          |  |
| Preferred language                         |                       |           |          |  |
| Type of visit (circle one)                 | tele = 1              | video = 2 | live = 3 |  |
| Reason for visit (ECV or FOV) (circle one) | Specific indication = |           |          |  |

Satisfaction: (patient to complete)

(1=definitely disagree, 2=disagree, 3=neutral, 4=somewhat agree, 5=definitely agree)

| Access to care                                                          | 1           | 2                   | 3                  | 4             | 5                |
|-------------------------------------------------------------------------|-------------|---------------------|--------------------|---------------|------------------|
| 1. I was able to schedule today's visit soon enough                     |             |                     |                    |               |                  |
| 2. I saw the provider I wanted to see today                             |             |                     |                    |               |                  |
| 3. I got the type of visit (telemedicine vs live) I wanted today        |             |                     |                    |               |                  |
| <b>Interpersonal interaction</b>                                        |             |                     |                    |               |                  |
| 4. In this visit, my provider spent enough time with me                 |             |                     |                    |               |                  |
| 5. In this visit, my provider listened to me                            |             |                     |                    |               |                  |
| 6. In this visit, my provider addressed all my concerns                 |             |                     |                    |               |                  |
| 7. In this visit my provider showed me respect                          |             |                     |                    |               |                  |
| <b>Quality of care</b>                                                  |             |                     |                    |               |                  |
| 8. In this visit, the quality of care was excellent                     |             |                     |                    |               |                  |
| 9. I would recommend the provider I saw today to family                 |             |                     |                    |               |                  |
| <b>Next visit preference</b>                                            |             |                     |                    |               |                  |
| 10. (If today was a Televisit), I prefer a televisit for my next visit  |             |                     |                    |               |                  |
| 11. (If today was a Livevisit) I prefer a live visit for my next visit. |             |                     |                    |               |                  |
| 12. Why or why not? (circle one)                                        | Convenience | time lost from work | time with provider | Visit quality | Other (use back) |
